# Supplementary material for: Multifunctional amine mediated synthesis of COF nanosheets for desalination membranes
Source: Royal Society of Chemistry journal article supplement (doi:10.1039/d5ta02024g), 2025-01-01
Supplement: d5ta02024g1.pdf [file d5ta02024g1.pdf]

## **Supporting Information**

### **Multifunctional amine mediated COF nanosheets for desalination membrane**

Junyi Zhao, Mengqi Bie, Qian Sun, Ziting Zhu, Sui Zhang\*, Fusheng Pan\* and Zhongyi  
Jiang\*

\*Correspondence author. Email: chezhangsui@nus.edu.sg fspan@tju.edu.cn and  
zhyjiang@tju.edu.cn

#### **This PDF file includes:**

Methods

Figures. S1 to S25

Tables S1 to S2

References (1–6)

#### **1. Supplementary methods**

SEM images were carried out by a Regulus 8100 instrument. TEM, HR-TEM, and electron diffraction were examined by JEOL JEM-F200 electron microscope. XRD curves were collected by a Smartlab instrument with Cu K $\alpha$  radiation. AFM images were acquired on Bruker Dimension Icon atomic force microscopy. The GIWAXS data were obtained at 1W1A Diffuse X-ray Scattering Station, Beijing Synchrotron Radiation Facility (BSRF-1W1A). Zeta potentials were taken from a Nano ZS instrument with a 4 mW He-Ne laser. FT-IR patterns were taken from Thermo Scientific Nicolet iS50. XPS was performed on an ESCALAB Xi+ instrument with an Al K $\alpha$  radiation source. WACs were measured by POWEREACH JC2000D2M static contact angle goniometer. The water states in COF nanochannels were investigated by DSC (Germany's Netzsch, 200 F3). Quartz crystal microbalance (QCM, Q-sense E1, Biolin Scientific) was used to record the water-capture ability which was calculated by the modified Sauerbrey Equation (1):

$$\Delta m = -\Delta f \frac{\sqrt{\rho_q \mu_q}}{2f_0^2} \quad (1)$$

Where  $\Delta m$  is the mass change on the sensor surface ( $\mu\text{g cm}^{-2}$ );  $\Delta f$  is the frequency change (Hz);  $f_0$  is the resonant frequency of the sensor (Hz);  $\rho_q$  and  $\mu_q$  are intrinsic parameters of quartz crystal: density ( $\mu\text{g cm}^{-3}$ ) and shear modulus ( $\mu\text{g cm}^{-1} \text{s}^{-2}$ ).

## 2. Supplementary Figures

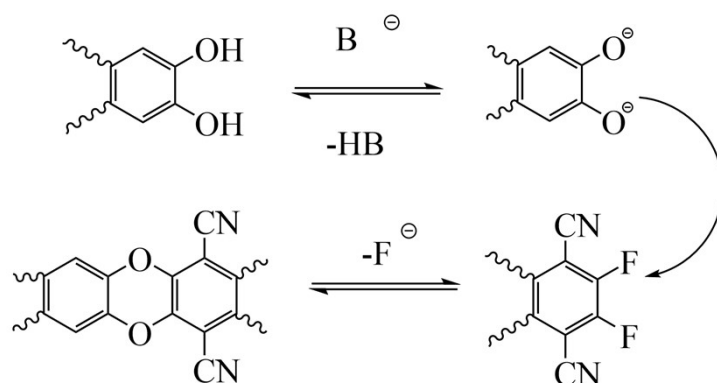

**Figure S1.** Proposed mechanism of dioxin linkage formation catalyzed by traditional catalyst.

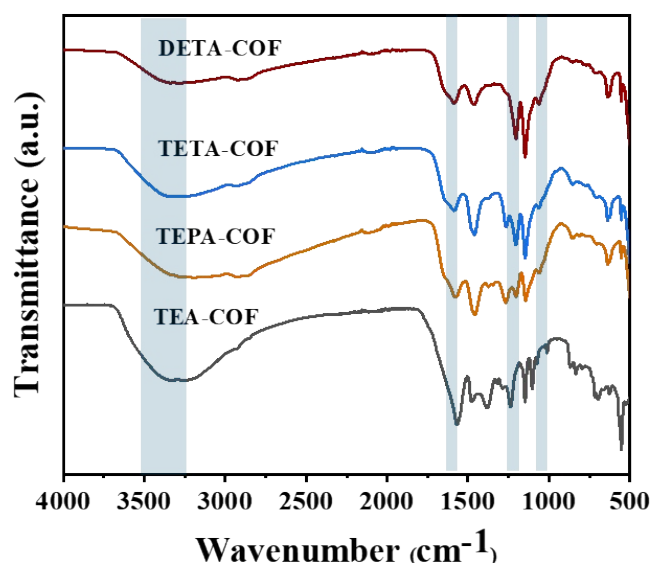

**Figure S2.** FT-IR spectra of DETA-COF, TETA-COF, TEPA-COF, and TEA-COF. Noted that compared with TEA-COF, both DETA-COF, TETA-COF, and TEPA-COF exhibit new peaks at  $1620\text{ cm}^{-1}$  attributed to  $\text{C}=\text{N}$ .

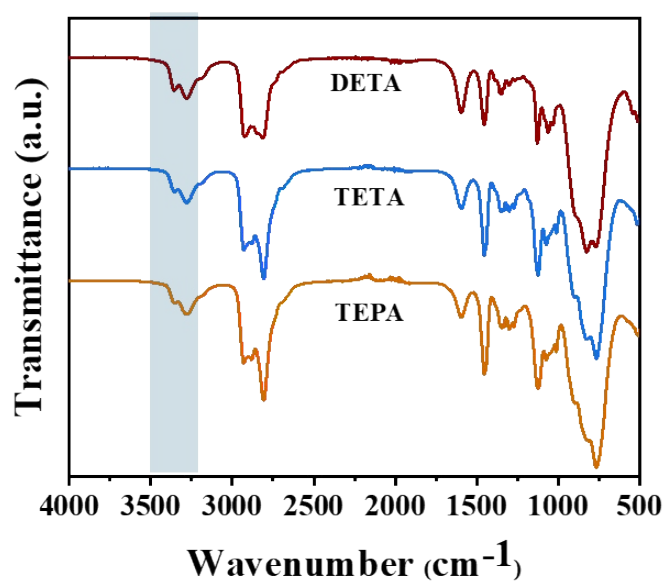

**Figure S3.** FT-IR spectra of DETA, TETA, and TEPA monomer.

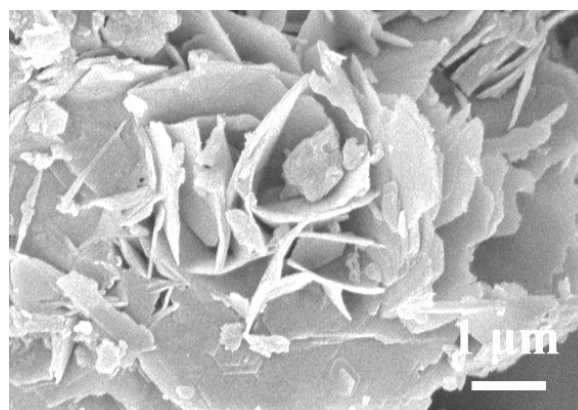

**Figure S4.** SEM images TETA-COF nanosheets.

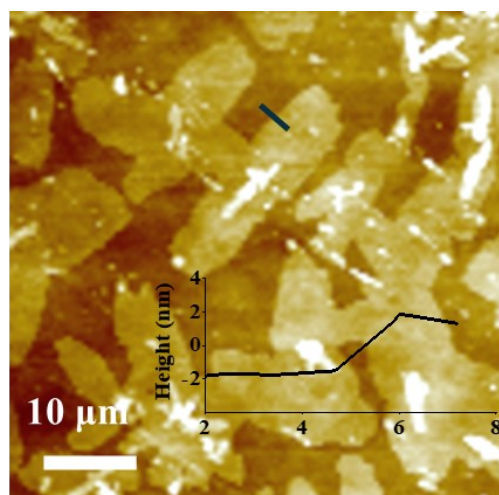

**Figure S5.** AFM images of TETA-COF nanosheets and the respective height profiles along the marked black line.

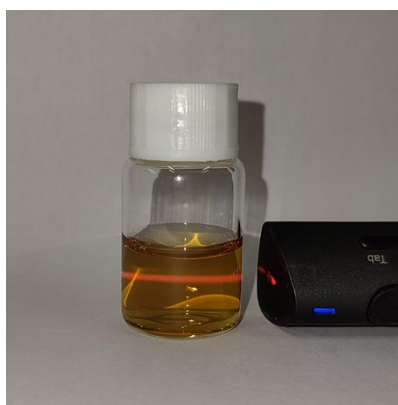

**Figure S6.** Tyndal effect of TETA-COF nanosheets aqueous dispersion.

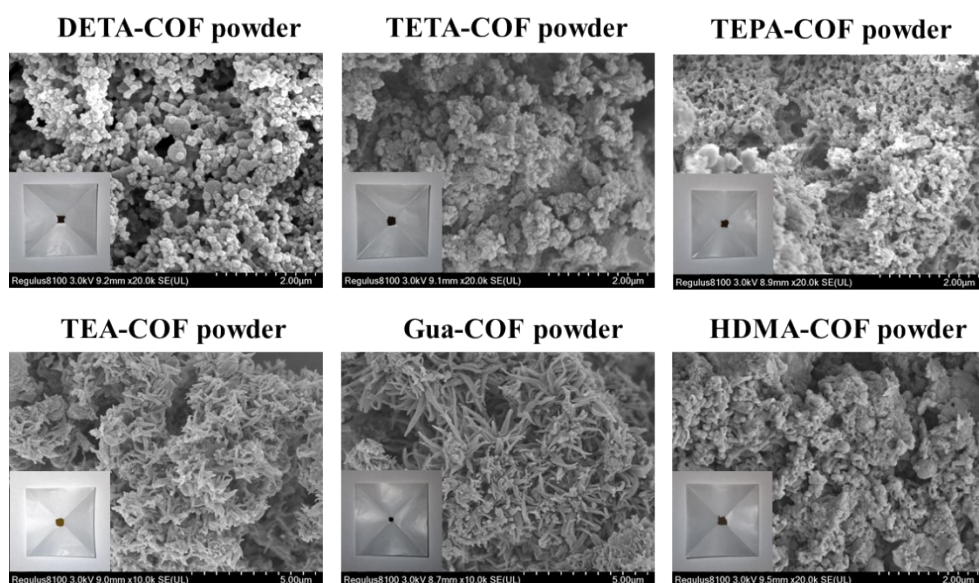

**Figure S7.** Photographic images and corresponding SEM images of the X-COF powders synthesized from the solvothermal method.

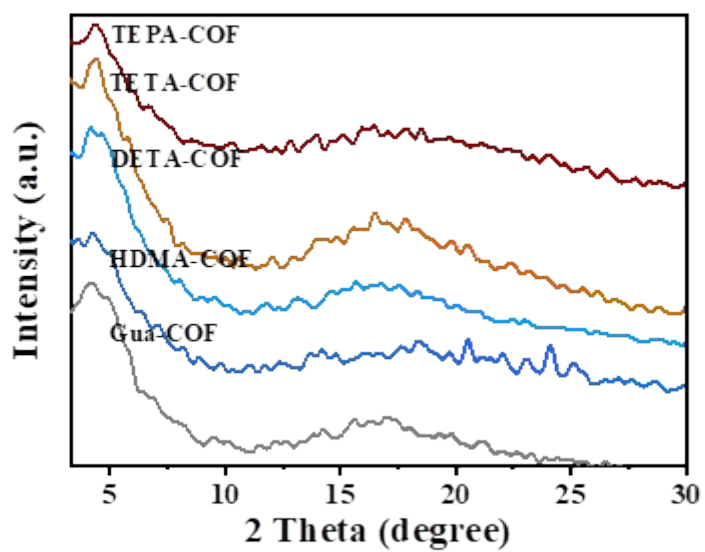

**Figure S8.** PXRD patterns of X-COF bulk powders synthesized by solvothermal synthesis.

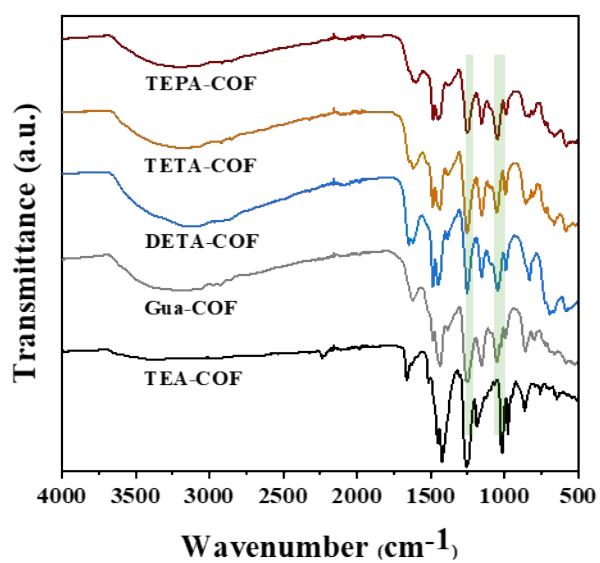

**Figure S9.** FT-IR spectra of X-COF powders synthesized by solvothermal synthesis.

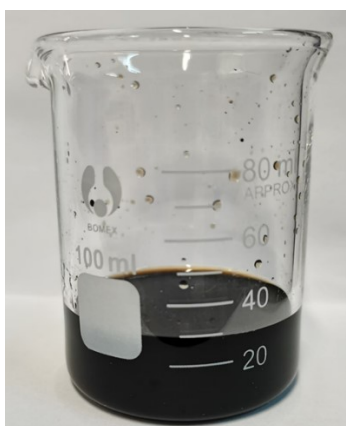

**Figure S10.** Photographic image of the suspension of oligomers dissolved in DMF.

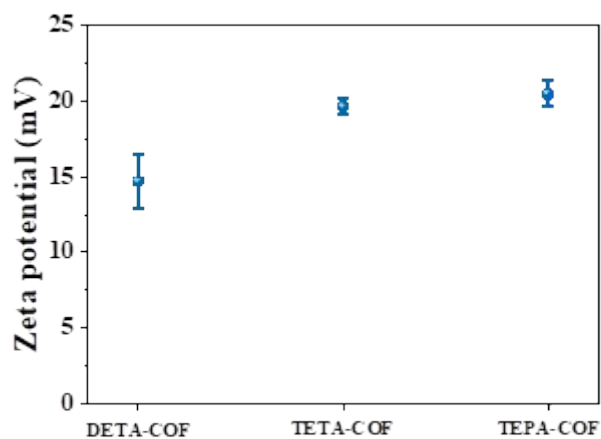

**Figure S11.** Zeta potential of DETA-COF, TETA-COF, and TEPA-COF nanosheet aqueous dispersion.

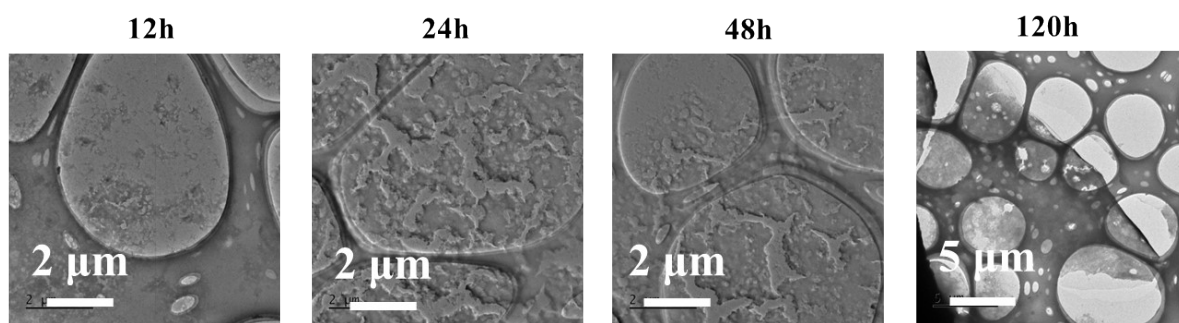

**Figure S12.** Time-dependent TEM images during the formation of TETA-COF nanosheets.

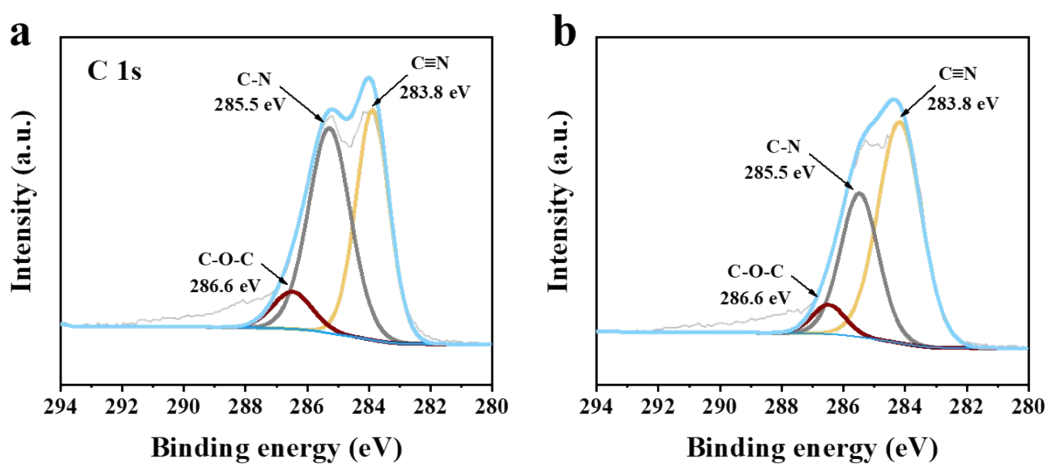

**Figure S13.** High-resolution XPS spectra of deconvoluted C 1s of heterogeneous a) DETA-COF and b) TEPA-COF.



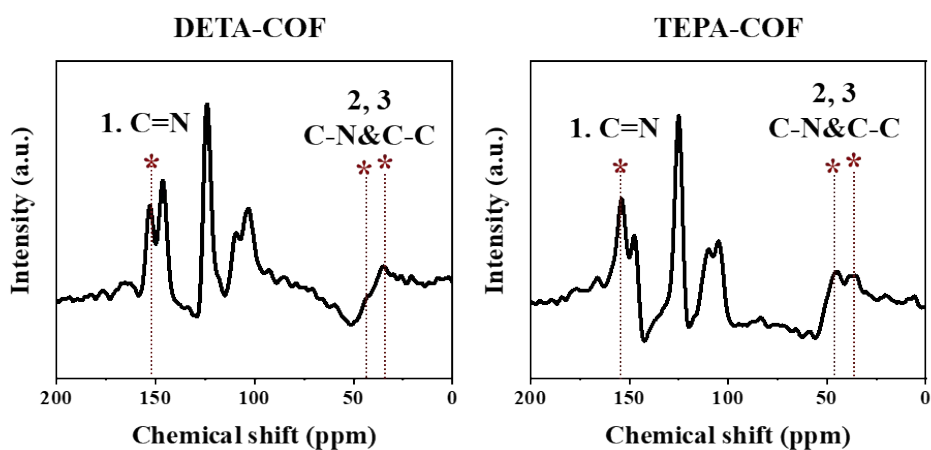

**Figure S14.** Solid-state  $^{13}\text{C}$  NMR spectrum of DETA-COF and TEPA-COF.

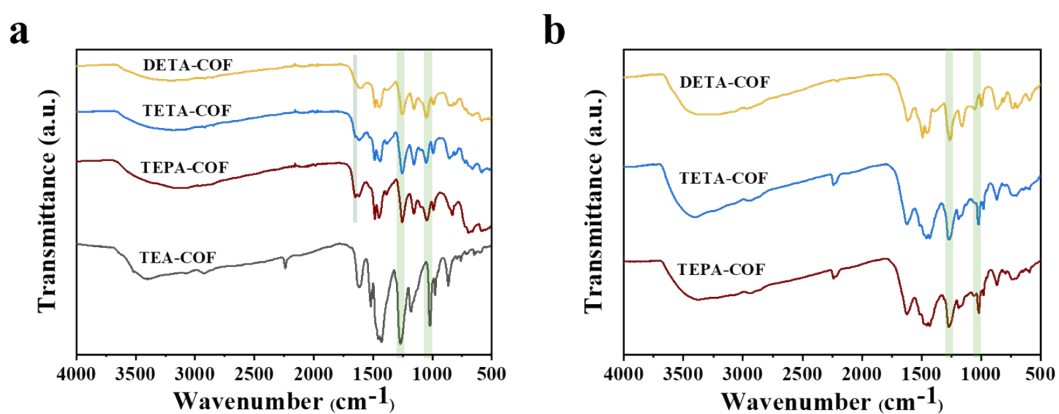

**Figure S15.** FT-IR spectra of the TETA-COF, DETA-COF, and TEPA-COF (a) before and (b) after the TFPN replacement.

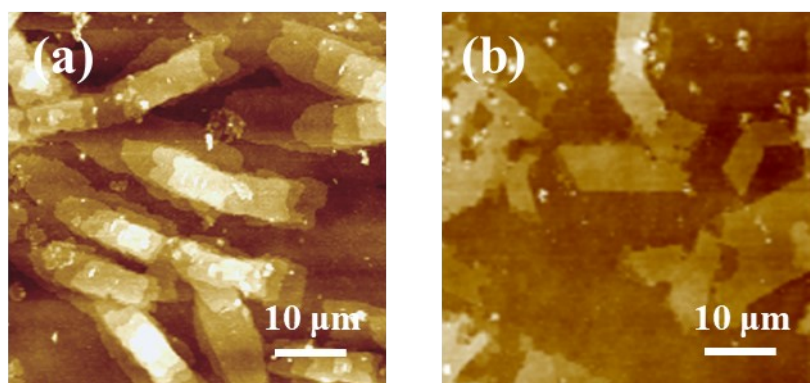

**Figure S16.** AFM images of the first type of amine catalyst. a) DETA-COF nanosheets. b) TEPA-COF nanosheets.

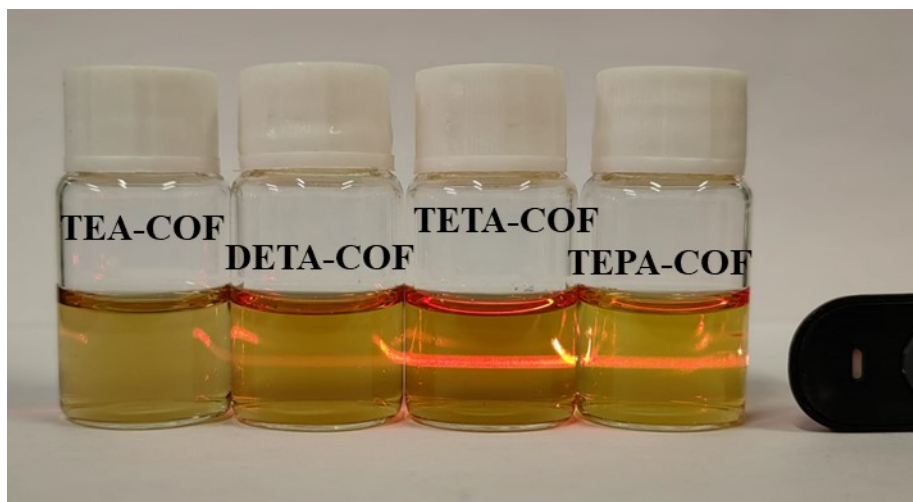

**Figure S17.** Comparison of Tyndall effect of TEA-COF, DETA-COF, TETA-COF, and TEPA-COF nanosheets aqueous dispersion. The great Tyndall effect indicates processability.

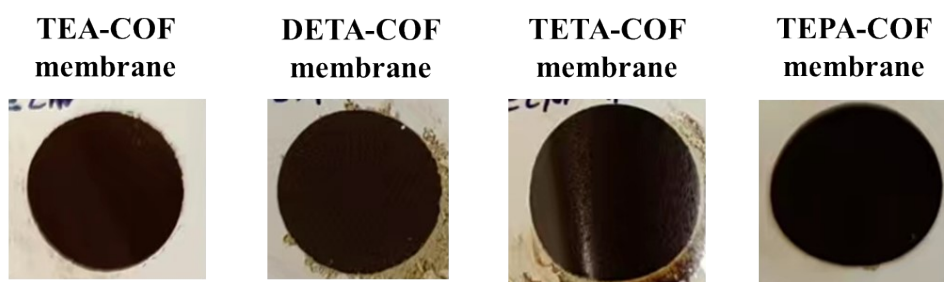

**Figure S18.** Photograph of various types of X-COF membranes.

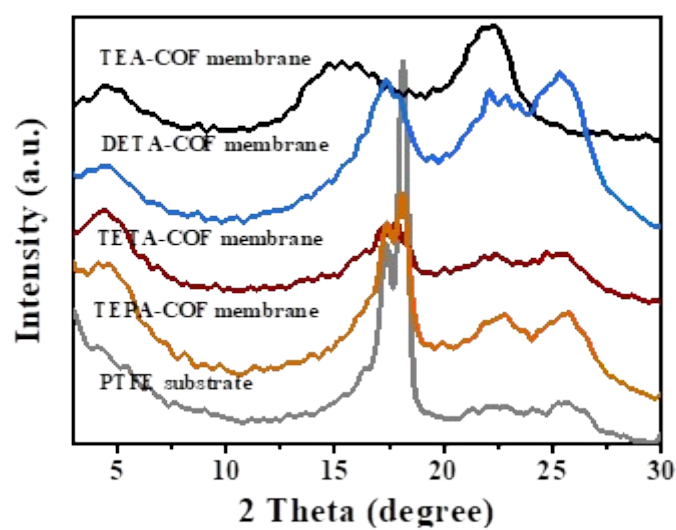

**Figure S19.** XRD patterns of the DETA-COF, TETA-COF, TEPA-COF, TEA-COF membranes, and PTFE substrate.

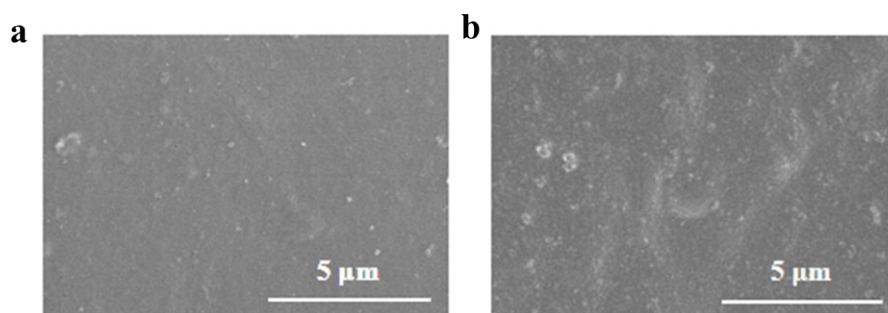

**Figure S20.** Surface SEM images of a) DETA-COF and b) TEPA-COF membrane.

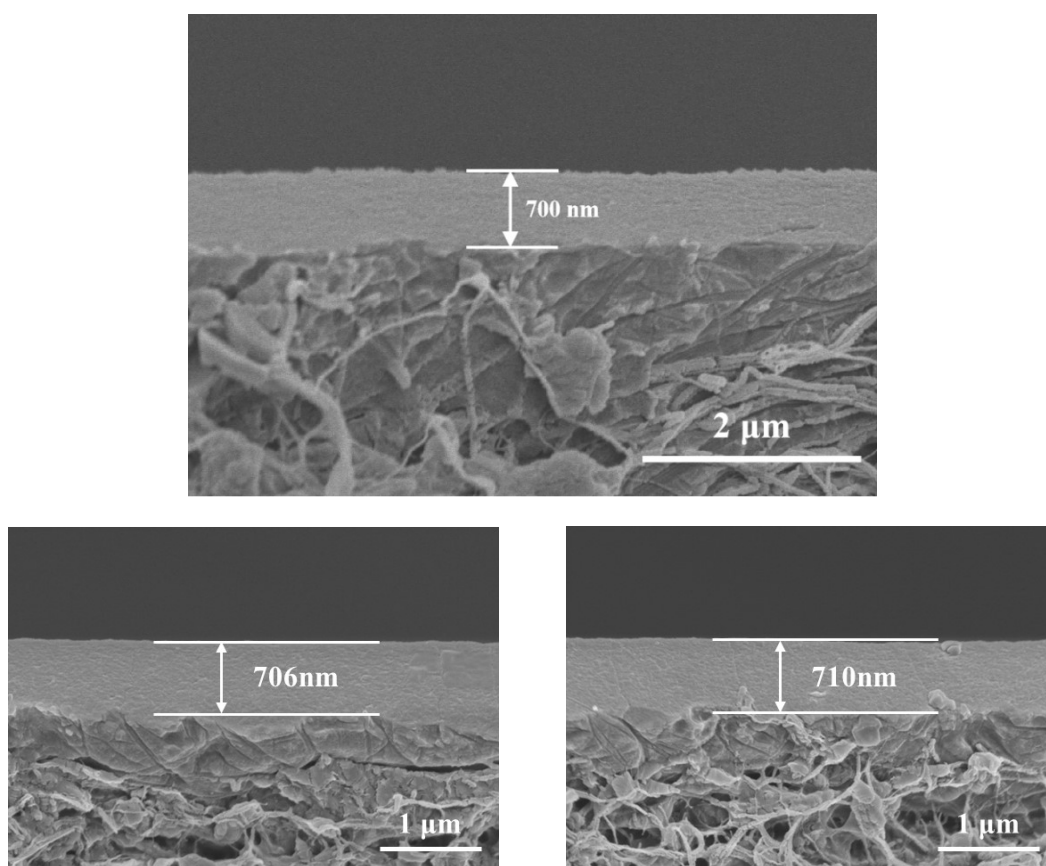

**Figure S21.** Cross-sectional SEM images of the TETA-COF, DETA-COF, and TEPA-COF membranes.

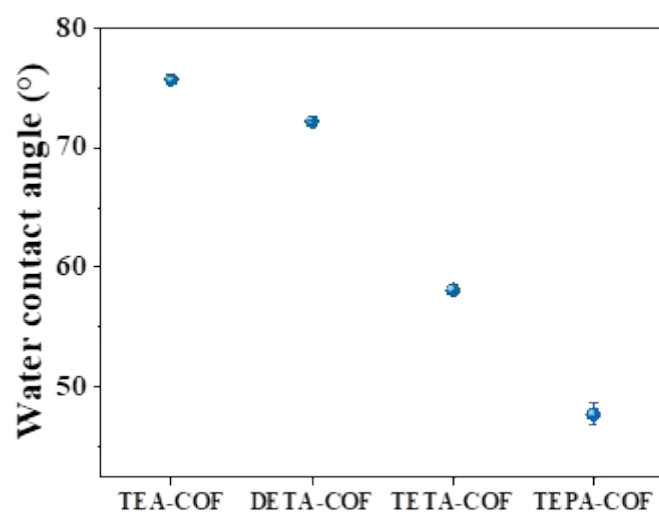

**Figure S22.** WCA test of TEA-COF, DETA-COF, TETA-COF, and TEPA-COF membrane.

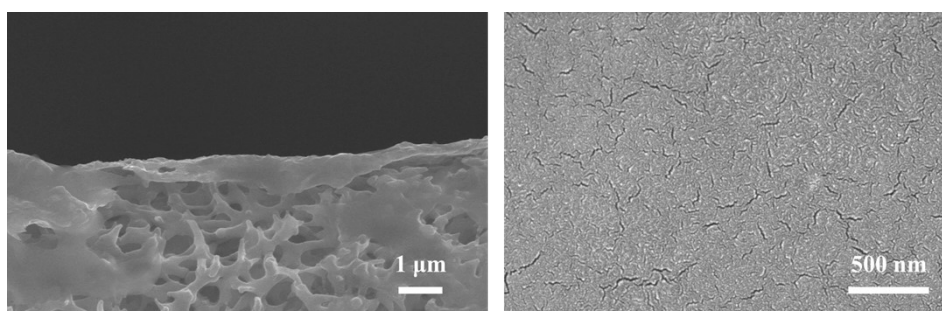

**Figure S23.** Surface and cross-sectional SEM images of pure COF membrane.

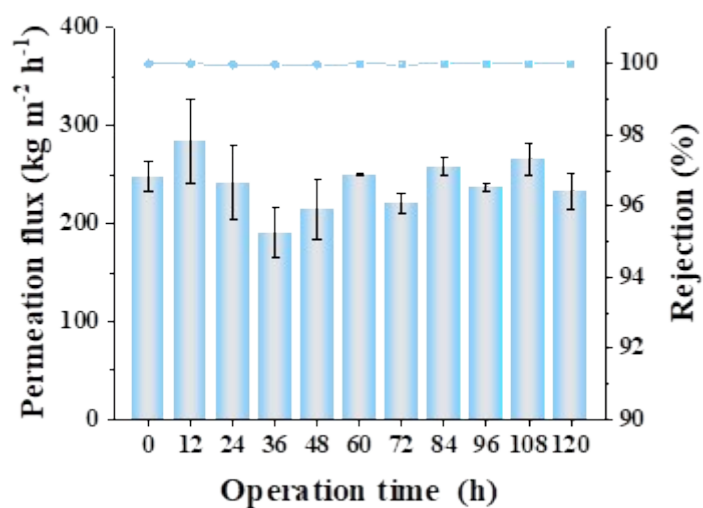

**Figure S24.** Long-term operational stability of TETA-COF membrane.

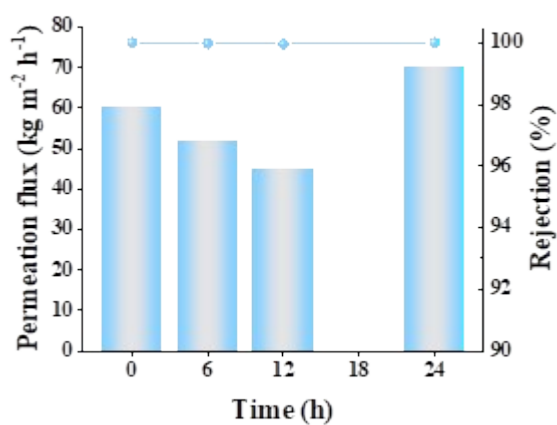

**Figure S25.** The desalination performance of the TETA-COF membrane when testing 3.5 wt% NaCl aqueous solution with 100 ppm NaClO.

**Table S1.** C/N ratio and addition contents analysis of DETA-COF, TETA-COF, and TEPA-COF nanosheets.

| Sample   | C/N ratio | Amine catalyst addition (%) |
|----------|-----------|-----------------------------|
| pure COF | 6.00      | 0                           |
| DETA-COF | 4.80      | 26.36                       |
| TETA-COF | 5.20      | 27.32                       |
| TEPA-COF | 4.85      | 26.24                       |

**Table S2.** Summary of desalination performance of representative membranes reported in the literature.

| <b>Membranes</b>                  | <b>Desalination technique</b> | <b>Feed temperature (°C)</b> | <b>Water flux (kg m<sup>-2</sup> h<sup>-1</sup>)</b> | <b>Salt rejection (%)</b> | <b>Ref.</b> |
|-----------------------------------|-------------------------------|------------------------------|------------------------------------------------------|---------------------------|-------------|
| POSS@GO                           | PV                            | 80                           | 112.7                                                | 99.98                     | 1           |
| PVA/PAN nanofiber composite       | PV                            | 55                           | ~126.2                                               | 99.6                      | 2           |
| hydrophilic nanofibrous webs      | PV                            | 80                           | 11                                                   | 99                        | 3           |
| COF <sub>DT</sub> -E18@cPVDF      | VMD                           | 55                           | ~88.3                                                | 99.9                      | 4           |
| Graphdiyne                        | VMD                           | 50                           | ~130                                                 | 99.9                      | 5           |
| Photothermal omniphobic membranes | VMD                           | 30                           | 2.94                                                 | >98                       | 6           |
| TETA-COF                          | PV                            | 50                           | <b>230.1</b>                                         | 99.97                     | This work   |

P.S.: The membrane-based desalination technique includes pervaporation (PV) and vacuum membrane distillation (VMD).

## References

- (1) Zhan, X.; Gao, Z.; Ge, R.; Lu, J.; Li, J.; Wan, X. Rigid POSS intercalated graphene oxide membranes with hydrophilic/hydrophobic heterostructure for efficient pervaporation desalination. *Desalination*, 2022, **543**, 116106.
- (2) Xue, Y. L.; Huang, J.; Lau, C. H.; Cao, B.; Li, P. Tailoring the molecular structure of crosslinked polymers for pervaporation desalination. *Nat. Commun.*, 2020, **11**, 1461.
- (3) Yang, M.; Yao, N.; Li, X.; Yu, J.; Zhang, S.; Ding, B. Dual-Asymmetric Janus Membranes Based on Two-Dimensional Nanowebs with Superspreading Surface for High-Performance Desalination. *ACS Nano*, **2024**, *18* (48), 33159-33167.
- (4) Zhao, S.; Jiang, C.; Fan, J.; Hong, S.; Mei, P.; Yao, R.; Liu, Y.; Zhang, S.; Li, H.; Zhang, H. *Nat. Mater.*, 2021, **20**, 1551-1558.
- (5) Chen, H.; Liu, X.; Gong, D.; Zhu, C.; Liu, G.; Fan, J.; Wu, P.; Li, Z.; Pan, Y.; Shi, G. *Nat. Water.*, 2023, **9**, 800-807.
- (6) Asadolahi, M.; Fashandi, H.; Ghodsi. *Chem. Eng. J.*, 2024, **500**, 157428.
